# Supplementary material for: Incidence of Hereditary Gastric Cancer May Be Much Higher than Reported
Source: MDPI journal article supplement (doi:10.3390/cancers14246125), 2022-12-12
Supplement: s1 [file s1]

**RepRep GENES**

|          |         |         |        |        |         |        |         |       |
|----------|---------|---------|--------|--------|---------|--------|---------|-------|
| ALKBH2   | CHEK1   | FANCB   | LIG4   | OGG1   | PRIM1   | RFC1   | TDP1    | XRCC5 |
| ALKBH3   | CHEK2   | FANCC   | MAD2L2 | PALB2  | PRIM2   | RFC2   | TDP2    | XRCC6 |
| APE1     | CLK2    | FANCD2  | MATR3  | PARP1  | PRIMPOL | RFC3   | TOP1    |       |
| APEX1    | CLSPN   | FANCE   | MBD4   | PARP2  | PRKDC   | RFC4   | TOP2A   |       |
| APEX2    | CRY1    | FANCF   | MCM9   | PARP3  | PRPF19  | RFC5   | TOP2B   |       |
| APITD1   | CUL4A   | FANCG   | MDC1   | PARP4  | PTTG1   | RIF1   | TOP3A   |       |
| APLF     | CUL4B   | FANCI   | MGMT   | PCNA   | RAD1    | RMI1   | TOP3B   |       |
| APTX     | DCLRE1A | FANCL   | MLH1   | PER1   | RAD17   | RMI2   | TOPBP1  |       |
| ASF1A    | DCLRE1B | FANCM   | MLH3   | PMS1   | RAD18   | RNF168 | TP53    |       |
| ATM      | DCLRE1C | FEN1    | MMS19  | PMS2   | RAD21   | RNF4   | TP53BP1 |       |
| ATR      | DDB1    | FPG     | MNAT1  | PMS2L3 | RAD23A  | RNF8   | TREX1   |       |
| ATRIP    | DDB2    | GADD45A | MPG    | PNKP   | RAD23B  | RPA1   | TREX2   |       |
| ATXN3    | DMC1    | GEN1    | MRE11A | POLA1  | RAD50   | RPA2   | UBE2A   |       |
| BCCIP    | DNTT    | GTF2H1  | MSH2   | POLB   | RAD51   | RPA3   | UBE2B   |       |
| BL1      | DUT     | GTF2H2  | MSH3   | POLD1  | RAD51B  | RPA4   | UBE2N   |       |
| BLM      | EME1    | GTF2H3  | MSH4   | POLD2  | RAD51C  | RRM2B  | UBE2T   |       |
| BRCA1    | EME2    | GTF2H4  | MSH5   | POLD3  | RAD51D  | SETMAR | UBE2V1  |       |
| BRCA2    | ENDOV   | GTF2H5  | MSH6   | POLD4  | RAD52   | SFPQ   | UBE2V2  |       |
| BRIP1    | ERCC1   | H1      | MTH1   | POLE   | RAD54B  | SHFM1  | UNG     |       |
| BTBD12   | ERCC2   | H2AFX   | MUS81  | POLE2  | RAD54L  | SHPRH  | USP1    |       |
| C17orf70 | ERCC3   | HELQ    | MUTYH  | POLE3  | RAD9A   | SLX1A  | UVSSA   |       |
| C19orf40 | ERCC4   | HFM1    | MYH    | POLE4  | RBBP8   | SLX1B  | WDR48   |       |
| C1orf86  | ERCC5   | HLTF    | NBN    | POLG   | RBM14   | SMC1A  | WRN     |       |
| C7orf11  | ERCC6   | HMGB1   | NEIL1  | POLH   | RBX1    | SMC3   | XAB2    |       |
| CCNH     | ERCC6L  | HMGB2   | NEIL2  | POLI   | RDM1    | SMC5   | XPA     |       |
| CDK7     | ERCC8   | HTATIP2 | NEIL3  | POLK   | RECQL   | SMUG1  | XPC     |       |
| CEBPG    | ESCO2   | HUS1    | NHEJ1  | POLL   | RECQL4  | SPO11  | XRCC1   |       |
| CETN2    | EXO1    | KAT5    | NTHL1  | POLM   | RECQL5  | SPRTN  | XRCC2   |       |
| CHAF1A   | FAN1    | LIG1    | NUDT1  | POLN   | REV1L   | SYCP3  | XRCC3   |       |
| CHAF1B   | FANCA   | LIG3    | OBFC2B | POLQ   | REV3L   | TDG    | XRCC4   |       |

Supplementary Table 2. Genes involved in the replication or repair processes (GRepRep).
