# Supplementary material for: Incidence of Hereditary Gastric Cancer May Be Much Higher than Reported
Source: MDPI journal article supplement (doi:10.3390/cancers14246125), 2022-12-12
Supplement: s1 [file s1]

| Sample | Region | Gender | Age | H.type     | Stage | PCR.urease | CAGA     | EBV      | GMB | Age2      | EBV_Urease | EBV_CAGA |
|--------|--------|--------|-----|------------|-------|------------|----------|----------|-----|-----------|------------|----------|
| CA130  | cardia | male   | 36  | intestinal | IV    | positive   | positive | negative | 63  | 30<Age<40 | positive   | positive |
| CA133  | body   | male   | 31  | diffuse    | IV    | positive   | positive | negative | 104 | 30<Age<40 | positive   | positive |
| CA134  | cardia | male   | 38  | diffuse    | IV    | positive   | positive | negative | 84  | 30<Age<40 | positive   | positive |
| CA14   | NA     | male   | 36  | diffuse    | III   | NA         | NA       | NA       | 55  | 30<Age<40 | NA         | NA       |
| CA142  | antrum | male   | 28  | diffuse    | IB    | positive   | positive | negative | 90  | 30-       | positive   | positive |
| CA149  | cardia | male   | 35  | intestinal | IIIB  | positive   | negative | negative | 69  | 30<Age<40 | positive   | negative |
| CA151  | body   | male   | 34  | diffuse    | IIIA  | positive   | positive | negative | 42  | 30<Age<40 | positive   | positive |
| CA154  | fundus | male   | 42  | intestinal | IV    | negative   | negative | negative | 82  | 40+       | negative   | negative |
| CA173  | body   | female | 45  | intestinal | IV    | positive   | positive | positive | 79  | 40+       | positive   | positive |
| CA175  | antrum | male   | 47  | intestinal | IIIB  | positive   | positive | negative | 82  | 40+       | positive   | positive |
| CA195  | antrum | male   | 47  | intestinal | IIIA  | positive   | positive | positive | 63  | 40+       | positive   | positive |
| CA208  | antrum | female | 49  | intestinal | IV    | positive   | positive | negative | 179 | 40+       | positive   | positive |
| CA211  | cardia | female | 34  | diffuse    | IV    | positive   | negative | negative | 52  | 30<Age<40 | positive   | negative |
| CA212  | antrum | male   | 39  | diffuse    | IIA   | positive   | positive | positive | 92  | 30<Age<40 | positive   | positive |
| CA213  | body   | female | 39  | intestinal | IV    | positive   | positive | negative | 68  | 30<Age<40 | positive   | positive |
| CA218  | antrum | female | 48  | diffuse    | IV    | negative   | negative | negative | 135 | 40+       | negative   | negative |
| CA224  | antrum | male   | 46  | diffuse    | IB    | positive   | positive | negative | 75  | 40+       | positive   | positive |
| CA232  | cardia | male   | 35  | intestinal | IIA   | positive   | negative | negative | 97  | 30<Age<40 | positive   | negative |
| CA274  | antrum | male   | 42  | diffuse    | IIIB  | positive   | positive | negative | 44  | 40+       | positive   | positive |
| CA292  | cardia | male   | 50  | diffuse    | IV    | negative   | negative | negative | 50  | 40+       | negative   | negative |
| CA302  | antrum | female | 33  | diffuse    | IV    | positive   | positive | negative | 55  | 30<Age<40 | positive   | positive |
| CA304  | body   | male   | 34  | diffuse    | IIIA  | positive   | positive | negative | 63  | 30<Age<40 | positive   | positive |
| CA362  | cardia | female | 47  | diffuse    | IIIA  | positive   | positive | negative | 70  | 40+       | positive   | positive |
| CA394  | cardia | male   | 47  | diffuse    | IV    | negative   | negative | negative | 69  | 40+       | negative   | negative |
| CA404  | body   | male   | 41  | diffuse    | IIIA  | positive   | positive | negative | 68  | 40+       | positive   | positive |
| CA408  | cardia | female | 48  | diffuse    | IIIB  | positive   | positive | negative | 87  | 40+       | positive   | positive |
| CA411  | fundus | male   | 49  | diffuse    | IV    | positive   | positive | negative | 38  | 40+       | positive   | positive |
| CA418  | cardia | male   | 34  | diffuse    | IIIA  | positive   | negative | negative | 68  | 30<Age<40 | positive   | negative |
| CA419  | body   | male   | 46  | diffuse    | IIIA  | negative   | negative | negative | 53  | 40+       | negative   | negative |
| CA425  | fundus | female | 49  | diffuse    | IV    | positive   | negative | negative | 69  | 40+       | positive   | negative |
| CA427  | cardia | male   | 48  | diffuse    | IV    | positive   | positive | negative | 105 | 40+       | positive   | positive |
| CA429  | antrum | male   | 35  | diffuse    | IIIA  | positive   | positive | negative | 96  | 30<Age<40 | positive   | positive |
| CA430  | antrum | male   | 46  | diffuse    | IIIA  | positive   | positive | positive | 50  | 40+       | positive   | positive |
| CA439  | antrum | female | 27  | diffuse    | IIA   | negative   | negative | negative | 103 | 30-       | negative   | negative |
| CA440  | antrum | female | 28  | diffuse    | IV    | negative   | negative | negative | 88  | 30-       | negative   | negative |
| CA441  | antrum | male   | 28  | diffuse    | IA    | negative   | negative | negative | 53  | 30-       | negative   | negative |
| CA442  | antrum | female | 29  | diffuse    | IV    | negative   | negative | negative | 99  | 30-       | negative   | negative |
| CA443  | antrum | female | 29  | diffuse    | IIIC  | negative   | negative | negative | 48  | 30-       | negative   | negative |
| CA444  | antrum | female | 30  | diffuse    | IIA   | positive   | positive | negative | 104 | 30-       | positive   | positive |
| CA445  | fundus | male   | 30  | intestinal | IIIC  | negative   | negative | negative | 48  | 30-       | negative   | negative |
| CA446  | antrum | male   | 30  | intestinal | IIB   | positive   | positive | positive | 90  | 30-       | positive   | positive |
| CA447  | antrum | female | 31  | diffuse    | IV    | positive   | positive | negative | 94  | 30<Age<40 | positive   | positive |
| CA448  | antrum | female | 31  | diffuse    | IV    | positive   | negative | negative | 32  | 30<Age<40 | positive   | negative |
| CA449  | antrum | female | 32  | diffuse    | IIA   | negative   | negative | negative | 92  | 30<Age<40 | negative   | negative |
| CA450  | antrum | male   | 32  | intestinal | IV    | negative   | negative | negative | 91  | 30<Age<40 | negative   | negative |
| CA451  | fundus | female | 32  | diffuse    | IIA   | positive   | positive | negative | 68  | 30<Age<40 | positive   | positive |
| CA452  | antrum | male   | 33  | intestinal | IV    | positive   | positive | negative | 89  | 30<Age<40 | positive   | positive |
| CA455  | fundus | female | 34  | diffuse    | IV    | positive   | positive | negative | 48  | 30<Age<40 | positive   | positive |

|       |        |        |    |            |      |          |          |          |     |           |          |          |
|-------|--------|--------|----|------------|------|----------|----------|----------|-----|-----------|----------|----------|
| CA456 | antrum | female | 35 | diffuse    | IV   | positive | positive | negative | 87  | 30<Age<40 | positive | positive |
| CA457 | antrum | female | 36 | diffuse    | IIA  | negative | negative | negative | 42  | 30<Age<40 | negative | negative |
| CA458 | fundus | male   | 37 | intestinal | IV   | negative | negative | negative | 103 | 30<Age<40 | negative | negative |
| CA459 | fundus | male   | 37 | intestinal | IV   | negative | negative | positive | 48  | 30<Age<40 | positive | positive |
| CA460 | cardia | female | 38 | diffuse    | IIA  | positive | positive | negative | 68  | 30<Age<40 | positive | positive |
| CA462 | antrum | female | 39 | intestinal | IIIA | positive | negative | negative | 94  | 30<Age<40 | positive | negative |
| CA463 | cardia | male   | 40 | intestinal | IIIC | positive | positive | negative | 68  | 40+       | positive | positive |
| CA464 | antrum | female | 40 | intestinal | IIA  | negative | negative | negative | 85  | 40+       | negative | negative |
| CA465 | antrum | male   | 40 | intestinal | IV   | positive | positive | negative | 16  | 40+       | positive | positive |
| CA466 | antrum | female | 41 | intestinal | IV   | negative | negative | positive | 76  | 40+       | positive | positive |
| CA467 | fundus | female | 41 | diffuse    | IIIB | negative | negative | negative | 82  | 40+       | negative | negative |
| CA468 | antrum | female | 42 | diffuse    | IV   | positive | positive | negative | 84  | 40+       | positive | positive |
| CA469 | fundus | female | 42 | diffuse    | IV   | positive | positive | negative | 59  | 40+       | positive | positive |
| CA470 | cardia | male   | 43 | intestinal | IV   | positive | negative | negative | 81  | 40+       | positive | negative |
| CA471 | fundus | female | 43 | intestinal | IIB  | negative | negative | negative | 82  | 40+       | negative | negative |
| CA472 | fundus | female | 44 | intestinal | IIIC | negative | negative | positive | 117 | 40+       | positive | positive |
| CA474 | cardia | male   | 44 | intestinal | IIB  | positive | positive | negative | 59  | 40+       | positive | positive |
| CA475 | cardia | male   | 45 | intestinal | IV   | positive | negative | positive | 61  | 40+       | positive | positive |
| CA477 | antrum | female | 45 | intestinal | IV   | negative | negative | negative | 62  | 40+       | negative | negative |
| CA479 | antrum | female | 46 | diffuse    | IIA  | positive | negative | negative | 66  | 40+       | positive | negative |
| CA480 | fundus | female | 46 | intestinal | IIA  | positive | positive | negative | 90  | 40+       | positive | positive |
| CA481 | fundus | female | 46 | intestinal | IIA  | positive | positive | negative | 109 | 40+       | positive | positive |
| CA482 | cardia | female | 47 | intestinal | IIA  | positive | positive | negative | 96  | 40+       | positive | positive |
| CA483 | fundus | female | 47 | intestinal | IV   | negative | negative | negative | 74  | 40+       | negative | negative |
| CA485 | cardia | female | 49 | intestinal | IV   | positive | negative | negative | 91  | 40+       | positive | negative |
| CA487 | antrum | female | 49 | intestinal | IV   | positive | negative | negative | 79  | 40+       | positive | negative |
| CA489 | cardia | female | 32 | diffuse    | IIIA | negative | negative | negative | 93  | 30<Age<40 | negative | negative |
| CA490 | fundus | female | 33 | diffuse    | IIB  | positive | negative | negative | 48  | 30<Age<40 | positive | negative |
| CA496 | antrum | female | 27 | diffuse    | IB   | positive | positive | negative | 66  | 30-       | positive | positive |
| CA523 | fundo  | female | 42 | diffuse    | IIIA | negative | negative | negative | 52  | 40+       | negative | negative |
| CA524 | antrum | male   | 41 | intestinal | IA   | positive | positive | negative | 129 | 40+       | positive | positive |
| CA687 | Cardia | male   | 37 | diffuse    | IV   | NA       | NA       | NA       | 25  | 30<Age<40 | NA       | NA       |
| CA688 | Cardia | male   | 35 | diffuse    | IV   | NA       | NA       | NA       | 7   | 30<Age<40 | NA       | NA       |
| CA691 | fundus | female | 34 | diffuse    | IV   | NA       | NA       | NA       | 69  | 30<Age<40 | NA       | NA       |
| CA693 | Cardia | male   | 38 | diffuse    | II   | NA       | NA       | NA       | 35  | 30<Age<40 | NA       | NA       |
| CA695 | antrum | female | 37 | diffuse    | II   | NA       | NA       | NA       | 15  | 30<Age<40 | NA       | NA       |
| CA706 | Cardia | male   | 31 | diffuse    | II   | NA       | NA       | NA       | 7   | 30<Age<40 | NA       | NA       |
| CA711 | Cardia | male   | 33 | diffuse    | IIA  | NA       | NA       | NA       | 0   | 30<Age<40 | NA       | NA       |
| CA717 | body   | female | 29 | diffuse    | IV   | NA       | NA       | NA       | 1   | 30-       | NA       | NA       |
| CA736 | body   | male   | 38 | diffuse    | IV   | NA       | NA       | NA       | 35  | 30<Age<40 | NA       | NA       |
| CA741 | antrum | male   | 35 | diffuse    | IB   | NA       | NA       | NA       | 54  | 30<Age<40 | NA       | NA       |
| CA742 | antrum | male   | 34 | diffuse    | IV   | NA       | NA       | NA       | 54  | 30<Age<40 | NA       | NA       |
| CA743 | antrum | male   | 33 | diffuse    | IB   | NA       | NA       | NA       | 55  | 30<Age<40 | NA       | NA       |
| CA867 | body   | female | 20 | diffuse    | III  | NA       | NA       | NA       | 23  | 30-       | NA       | NA       |
| CA940 | body   | female | 25 | diffuse    | IA   | NA       | NA       | NA       | 79  | 30-       | NA       | NA       |
| CA946 | body   | male   | 38 | diffuse    | IB   | NA       | NA       | NA       | 70  | 30<Age<40 | NA       | NA       |
| CA950 | body   | female | 35 | diffuse    | IA   | NA       | NA       | NA       | 23  | 30<Age<40 | NA       | NA       |

Supplementary Table 1. Clinical and pathological data of the patients.
